# Supplementary material
Source: MDPI journal article supplement (https://www.mdpi.com/1999-4907/11/8/825)
Supplement: s1 [file s1]

# Supplementary Materials:

**Table S1.** Average cooling effect of the three configuration modes.

|                                   | Devision         | N       | Mean   | SD      | SE      | Duncan Group |
|-----------------------------------|------------------|---------|--------|---------|---------|--------------|
| Descriptive Statistics            | IP               | 180     | 1.0197 | 0.77727 | 0.05793 | A            |
|                                   | LP               | 180     | 1.3658 | 0.96145 | 0.07166 | B            |
|                                   | GP               | 180     | 2.0458 | 0.96646 | 0.07204 | C            |
|                                   | Total            | 540     | 1.4771 | 0.99990 | 0.04303 |              |
| Test for Homogeneity of Variances | Levene Statistic | df1     |        | df2     |         | P            |
|                                   | 2.480            | 2       |        | 537     |         | 0.085        |
| Analysis of Variance              | Devision         | SS      | df     | MS      | F-ratio | P            |
|                                   | Between Groups   | 98.088  | 2      | 49.044  | 59.747  | 0.000        |
|                                   | Within Groups    | 440.804 | 537    | 0.821   |         |              |
|                                   | Total            | 538.892 | 539    |         |         |              |

IP: individual planting; LP: linear planting; GP: group planting.

**Table S2.** Average humidifying effect of the three configuration modes.

|                                   | Devision         | N        | Mean   | SD      | SE      | Duncan Group |
|-----------------------------------|------------------|----------|--------|---------|---------|--------------|
| Descriptive Statistics            | IP               | 180      | 2.0960 | 1.81355 | 0.13577 | A            |
|                                   | LP               | 180      | 2.7468 | 2.07930 | 0.15498 | B            |
|                                   | GP               | 180      | 3.4506 | 2.15359 | 0.16052 | C            |
|                                   | Total            | 540      | 2.7645 | 2.09162 | 0.09001 |              |
| Test for Homogeneity of Variances | Levene Statistic | df1      |        | df2     |         | P            |
|                                   | 1.170            | 2        |        | 537     |         | 0.311        |
| Analysis of Variance              | Devision         | SS       | df     | MS      | F-ratio | P            |
|                                   | Between Groups   | 165.227  | 2      | 82.614  | 20.231  | 0.000        |
|                                   | Within Groups    | 2192.819 | 537    | 4.083   |         |              |
|                                   | Total            | 2358.046 | 539    |         |         |              |

IP: individual planting; LP: linear planting; GP: group planting.

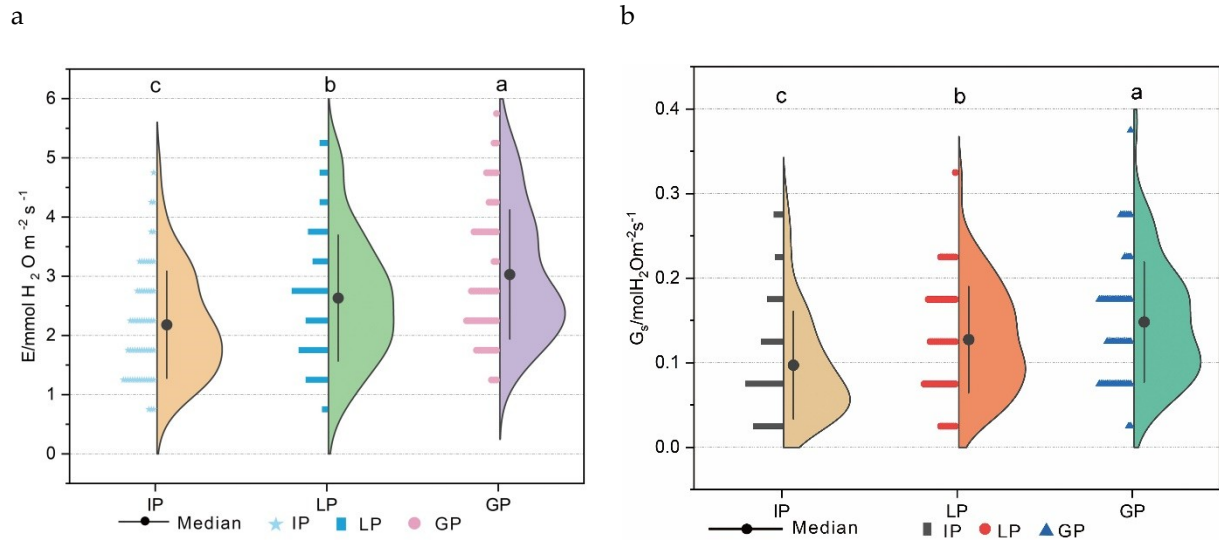

**Figure S1.** Differences in transpiration characteristics among the three configuration modes. **(a)**  $E$ ; **(b)**  $G_s$ . Significant differences between configuration modes are indicated by different letters ( $p < 0.05$ ).  $E$ : transpiration rate;  $G_s$ : stomatal conductance. The filled area represents data distribution.

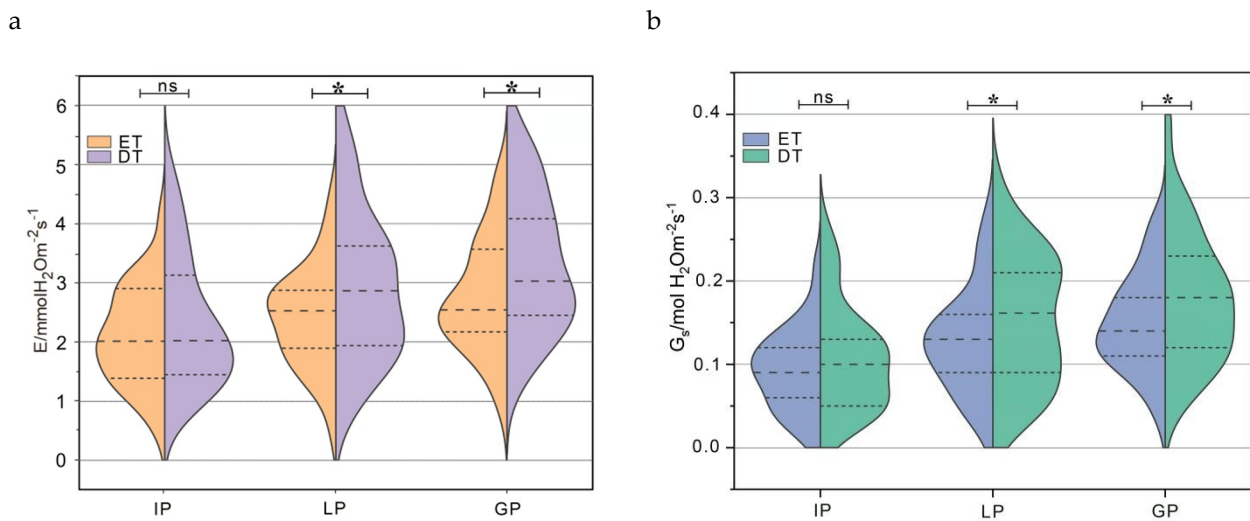

**Figure S2.** Transpiration characteristics of evergreen and deciduous tree species. **(a)**  $E$ ; **(b)**  $G_s$ . ns: no significant; \*represents a significant level ( $p < 0.05$ ).  $E$ : transpiration rate;  $G_s$ : stomatal conductance; ET: evergreen tree species; DT: deciduous tree species.

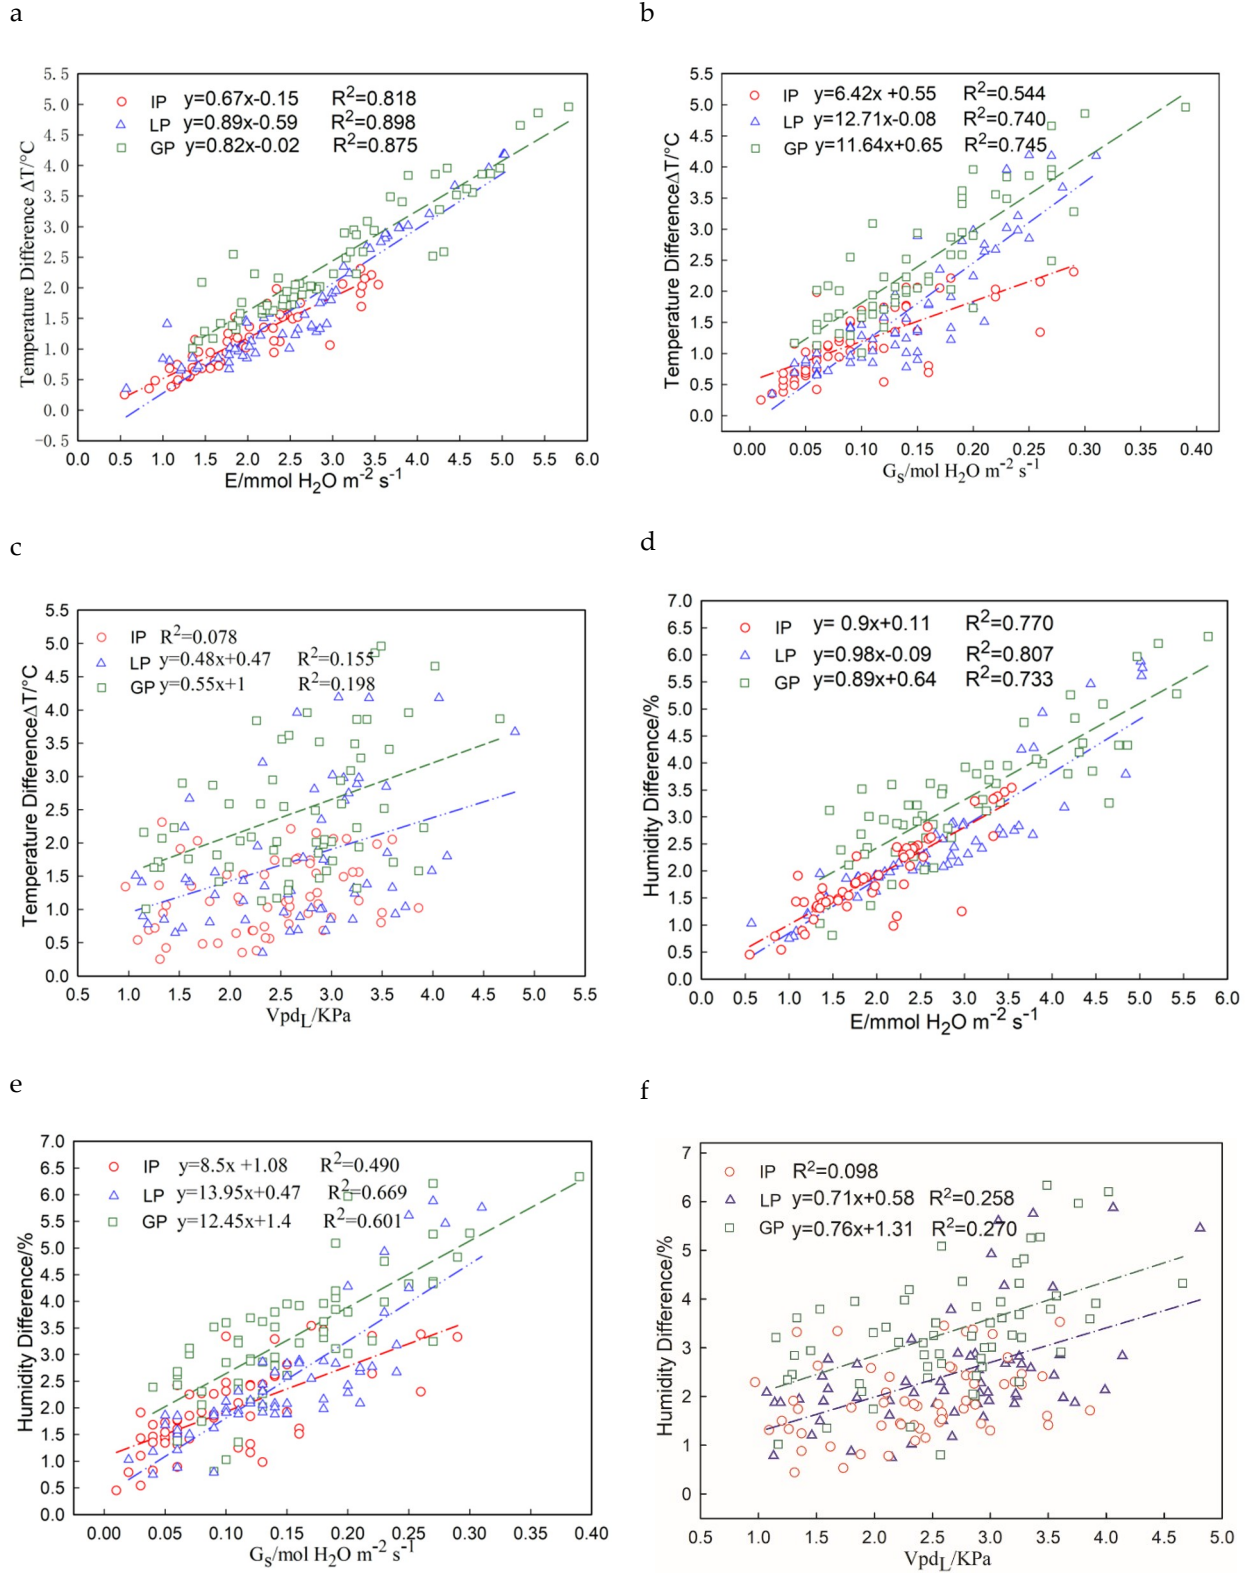

**Figure S3.** Correlation and fitting function model of microclimate regulation and transpiration characteristics of urban trees with different configuration modes. (a) E and cooling effect; (b)  $G_s$  and cooling effect; (c)  $V_{pdL}$  and cooling effect; (d) E and humidifying effect; (e)  $G_s$  and humidifying effect; (f)  $V_{pdL}$  and humidifying effect. IP: individual planting; LP: linear planting; GP: group planting; E: transpiration rate;  $G_s$ : stomatal conductance.

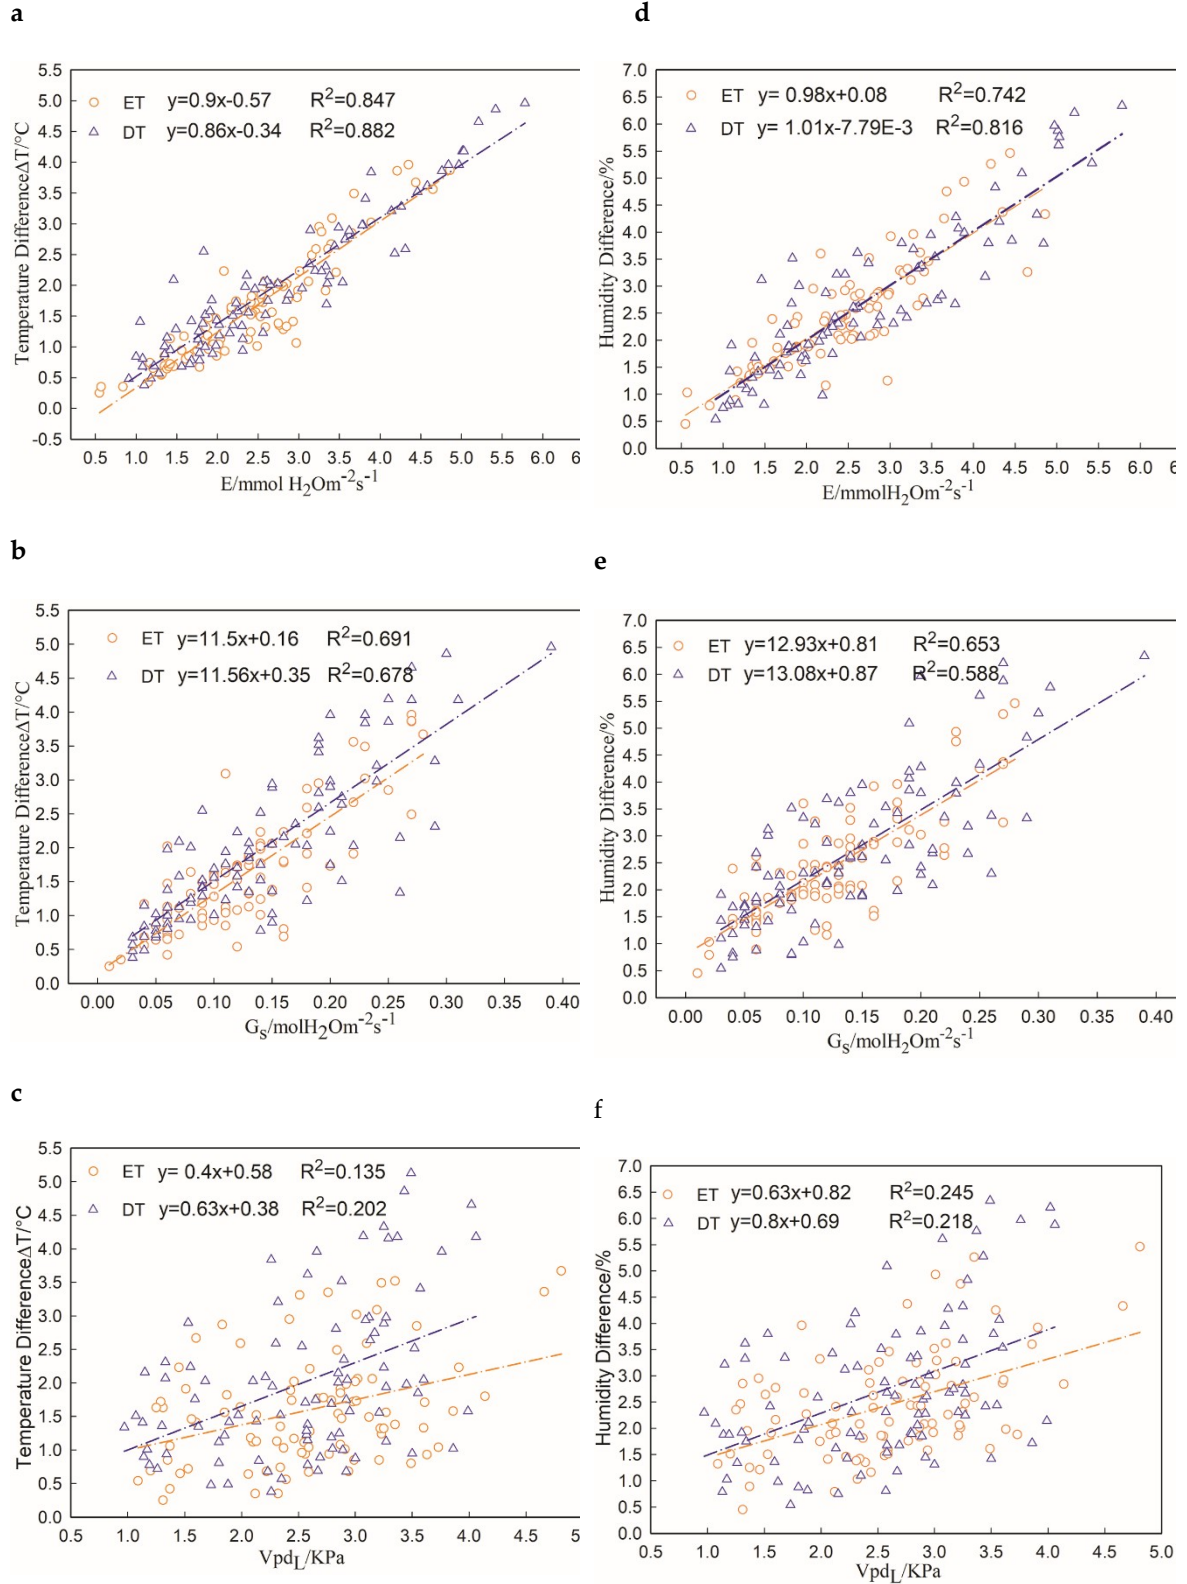

**Figure S4:** Microclimate regulation and transpiration characteristics of ET and DT. (a) E and cooling effect; (b)  $G_s$  and cooling effect; (c)  $V_{pdL}$  and cooling effect; (d) E and humidifying effect; (e)  $G_s$  and humidifying effect; (f)  $V_{pdL}$  and humidifying effect. ET: evergreen tree species; DT: deciduous tree species; E: transpiration rate;  $G_s$ : stomatal conductance;  $V_{pdL}$ : vapor pressure deficit.
